# Supplementary material for: The structure of chlorophyll a–water complexes: insights from quantum chemistry calculations
Source: Royal Society of Chemistry journal article supplement (doi:10.1039/b716800d), 2008-01-01
Supplement: b716800d.pdf [file b716800d.pdf]

## The structure of Chlorophyll a - water complexes: insights from quantum chemistry calculations

By A. Ben Fredj, Z. Ben Lakhdar and M. F. Ruiz-López

### Supplementary information

**Table S1.** Cartesian coordinates (in Å) and total energies (in Hartree) for Chl.a-46 and Chl.a-73 models and their monohydrated (1w) and dihydrated (2w and 2w') complexes for optimized geometries at the B3LYP/6-31G\* level in gas phase.

Chl.a-46

|   |           |           |           |
|---|-----------|-----------|-----------|
| N | -0.000056 | 0.000000  | 0.000045  |
| C | -0.000039 | 0.000000  | 1.382464  |
| C | 1.301110  | 0.000000  | -0.411981 |
| C | -1.144575 | 0.000000  | 2.172163  |
| C | -2.492559 | 0.000000  | 1.748842  |
| N | -2.898196 | 0.000000  | 0.443889  |
| C | -4.277686 | 0.000000  | 0.445745  |
| C | -5.090526 | 0.000000  | -0.701015 |
| C | -4.650119 | 0.000000  | -2.028288 |
| N | -3.295144 | 0.000000  | -2.353281 |
| C | -3.239239 | 0.000000  | -3.689079 |
| H | -6.164449 | 0.000000  | -0.534251 |
| C | -5.439541 | 0.000000  | -3.236323 |
| H | -6.521394 | 0.000000  | -3.277630 |
| C | -4.749724 | 0.000000  | 1.807687  |
| H | -5.790736 | 0.000000  | 2.106532  |
| C | -4.533154 | 0.000000  | -4.284821 |
| C | -2.172694 | 0.000000  | -4.616398 |
| C | -0.838268 | 0.000000  | -4.271161 |
| N | -0.403494 | 0.000000  | -2.966074 |
| C | 0.953867  | 0.000000  | -2.910741 |
| C | 1.382406  | 0.000000  | 1.861869  |
| C | -2.811081 | 0.000000  | -6.000635 |
| C | 1.727787  | 0.000000  | -1.758355 |
| C | 1.562120  | 0.000000  | -4.309008 |
| C | 2.169782  | 0.000000  | 0.732253  |
| H | 3.251555  | 0.000000  | 0.684688  |
| H | -0.998703 | 0.000000  | 3.247916  |
| H | 2.804133  | 0.000000  | -1.908218 |
| C | 1.788696  | 0.000000  | 3.261584  |
| C | -4.359636 | 0.000000  | -5.747636 |
| C | 0.331021  | 0.000000  | -5.240191 |
| H | 0.298463  | 0.878561  | -5.895084 |
| H | 0.298463  | -0.878561 | -5.895084 |
| C | -3.644220 | 0.000000  | 2.616147  |
| H | 0.984549  | 0.000000  | 3.994846  |
| H | -2.551423 | 0.879581  | -6.604889 |

|    |           |           |           |
|----|-----------|-----------|-----------|
| Mg | -1.636802 | 0.000000  | -1.200041 |
| C  | 3.050042  | 0.000000  | 3.717538  |
| H  | 2.199331  | -0.879296 | -4.455996 |
| H  | 2.199331  | 0.879296  | -4.455996 |
| O  | -5.196170 | 0.000000  | -6.630524 |
| H  | -2.551423 | -0.879581 | -6.604889 |
| H  | 3.909717  | 0.000000  | 3.052445  |
| H  | 3.261302  | 0.000000  | 4.782312  |
| H  | -3.612392 | 0.000000  | 3.698694  |

ENERGY=-1418.636710 Hartree

---

Ch.a-46 1w

|    |           |           |           |
|----|-----------|-----------|-----------|
| N  | -0.004613 | -0.015316 | 0.000814  |
| C  | -0.002946 | -0.055700 | -1.378197 |
| C  | 1.292916  | -0.013788 | 0.415314  |
| C  | -1.145745 | -0.106534 | -2.170634 |
| C  | -2.495654 | -0.164994 | -1.753087 |
| N  | -2.910132 | -0.141236 | -0.454738 |
| C  | -4.281644 | -0.268155 | -0.461339 |
| C  | -5.095033 | -0.335619 | 0.682691  |
| C  | -4.660603 | -0.305425 | 2.014432  |
| N  | -3.317499 | -0.141155 | 2.345389  |
| C  | -3.254526 | -0.240075 | 3.677539  |
| H  | -6.161663 | -0.458286 | 0.512848  |
| C  | -5.440901 | -0.481272 | 3.214977  |
| H  | -6.512069 | -0.635207 | 3.250239  |
| C  | -4.744529 | -0.359411 | -1.826350 |
| H  | -5.778785 | -0.469868 | -2.128739 |
| C  | -4.536919 | -0.441020 | 4.266526  |
| C  | -2.185840 | -0.230242 | 4.606703  |
| C  | -0.850276 | -0.161115 | 4.268358  |
| N  | -0.412498 | -0.046478 | 2.971019  |
| C  | 0.943247  | -0.055609 | 2.916643  |
| C  | 1.381717  | -0.062875 | -1.857765 |
| C  | -2.817879 | -0.407893 | 5.983010  |
| C  | 1.718305  | -0.013881 | 1.764010  |
| C  | 1.550832  | -0.136254 | 4.314642  |
| C  | 2.166895  | -0.038369 | -0.727681 |
| H  | 3.248557  | -0.055572 | -0.678595 |
| H  | -0.994999 | -0.134033 | -3.245606 |
| H  | 2.794776  | -0.022694 | 1.914687  |
| C  | 1.789759  | -0.102113 | -3.256382 |
| C  | -4.359060 | -0.546081 | 5.723343  |
| C  | 0.317835  | -0.238103 | 5.238624  |
| H  | 0.275352  | 0.569570  | 5.978768  |
| H  | 0.295380  | -1.177838 | 5.803184  |
| C  | -3.637701 | -0.294563 | -2.628367 |
| H  | 0.989729  | -0.213164 | -3.985905 |
| H  | -2.648116 | 0.438827  | 6.662136  |
| H  | -3.596448 | -0.342451 | -3.709642 |
| Mg | -1.660810 | 0.198693  | 1.187759  |
| C  | 3.046583  | -0.012602 | -3.716413 |

|   |           |           |           |
|---|-----------|-----------|-----------|
| H | 2.215665  | -1.002360 | 4.403702  |
| H | 2.160277  | 0.750380  | 4.526276  |
| O | -5.187360 | -0.704080 | 6.600940  |
| H | -2.467428 | -1.303629 | 6.513430  |
| H | 3.901201  | 0.107798  | -3.055596 |
| H | 3.258920  | -0.055660 | -4.780185 |
| O | -1.804232 | 2.329374  | 1.395608  |
| H | -2.588014 | 2.481859  | 1.949991  |
| H | -1.058162 | 2.734636  | 1.865703  |

ENERGY=-1495.073097 Hartree

---

Ch.a-46 2w (5-coordinated)

|    |           |           |           |
|----|-----------|-----------|-----------|
| C  | 2.939747  | -1.413905 | 0.145583  |
| C  | 2.763790  | -0.012898 | 0.228819  |
| C  | 3.977302  | 0.712870  | 0.420447  |
| C  | 5.089437  | -0.251608 | 0.440703  |
| C  | 4.439059  | -1.665820 | 0.255417  |
| C  | 3.615154  | 2.045966  | 0.530361  |
| C  | 2.175879  | 2.074820  | 0.403951  |
| N  | 1.692619  | 0.786338  | 0.202018  |
| C  | 1.318478  | 3.181641  | 0.498125  |
| C  | -0.089123 | 3.148797  | 0.459042  |
| N  | -0.852301 | 2.013173  | 0.285776  |
| C  | -2.159549 | 2.389789  | 0.381794  |
| C  | -2.244686 | 3.816661  | 0.596576  |
| C  | -0.961112 | 4.287413  | 0.642911  |
| C  | -3.261422 | 1.506048  | 0.323076  |
| C  | -3.240719 | 0.118097  | 0.216142  |
| N  | -2.098110 | -0.642506 | 0.091588  |
| C  | -2.476657 | -1.951736 | 0.060018  |
| C  | -3.911713 | -2.043919 | 0.145920  |
| C  | -4.410465 | -0.765807 | 0.241944  |
| Mg | -0.185555 | 0.065362  | -0.215240 |
| O  | -0.193907 | 0.196117  | -2.305039 |
| C  | -1.598707 | -3.054658 | -0.014944 |
| C  | -0.207193 | -3.058550 | -0.018222 |
| N  | 0.592702  | -1.967522 | 0.009138  |
| C  | 1.912669  | -2.332113 | 0.057151  |
| C  | 2.070214  | -3.843434 | 0.032325  |
| C  | 0.611563  | -4.345940 | -0.030488 |
| C  | -5.796234 | -0.329832 | 0.362607  |
| C  | -6.882219 | -1.103125 | 0.215482  |
| O  | 6.284300  | -0.058356 | 0.566489  |
| H  | 1.777561  | 4.153437  | 0.662959  |
| H  | 4.248518  | 2.907152  | 0.703355  |
| H  | -0.632478 | 5.306437  | 0.807565  |
| H  | -4.472392 | -2.970347 | 0.161070  |
| H  | -4.235965 | 1.976578  | 0.412220  |
| H  | -2.075915 | -4.031108 | -0.035177 |
| H  | 2.664054  | -4.163623 | -0.831736 |
| H  | 2.599101  | -4.199430 | 0.924318  |
| H  | -5.949817 | 0.723066  | 0.592299  |
| H  | 4.872965  | -2.141185 | -0.634829 |
| H  | 0.349769  | -4.984620 | 0.820479  |
| H  | 0.407678  | -4.927811 | -0.936754 |

|   |           |           |           |
|---|-----------|-----------|-----------|
| H | 4.716628  | -2.298055 | 1.109661  |
| H | -6.814196 | -2.160414 | -0.027626 |
| H | -7.881622 | -0.695392 | 0.331761  |
| H | -3.162911 | 4.379205  | 0.713229  |
| H | 0.207590  | 1.059456  | -2.599515 |
| H | -1.079323 | 0.149709  | -2.696799 |
| O | 0.988293  | 2.577150  | -2.761949 |
| H | 1.935031  | 2.399432  | -2.639642 |
| H | 0.737564  | 3.034967  | -1.938050 |

ENERGY=-1571.509875 Hartree

---

Chl.a-46 2w' (6-coordinated)

|    |           |           |           |
|----|-----------|-----------|-----------|
| C  | 0.752737  | 4.452789  | 0.000000  |
| C  | -0.079670 | 3.272289  | 0.000000  |
| N  | 0.713948  | 2.157660  | 0.000000  |
| C  | 2.026621  | 2.579715  | 0.000000  |
| C  | 2.054849  | 4.023438  | 0.000000  |
| Mg | 0.002293  | 0.158385  | 0.000000  |
| N  | -0.645800 | -1.886304 | 0.000000  |
| C  | -1.949747 | -2.240253 | 0.000000  |
| C  | -2.100162 | -3.759931 | 0.000000  |
| C  | -0.638665 | -4.266287 | 0.000000  |
| C  | 0.173541  | -2.980375 | 0.000000  |
| C  | 3.155074  | 1.730041  | 0.000000  |
| C  | 3.145044  | 0.327775  | 0.000000  |
| N  | 1.959760  | -0.389177 | 0.000000  |
| C  | 2.296497  | -1.678408 | 0.000000  |
| C  | 3.714477  | -1.861274 | 0.000000  |
| C  | 4.266645  | -0.591649 | 0.000000  |
| C  | 3.984834  | -3.309353 | 0.000000  |
| C  | 2.582989  | -4.013320 | 0.000000  |
| C  | 1.555373  | -2.886050 | 0.000000  |
| C  | -1.497005 | 3.259079  | 0.000000  |
| C  | -2.361402 | 2.160107  | 0.000000  |
| N  | -1.946825 | 0.844351  | 0.000000  |
| C  | -3.055620 | 0.047852  | 0.000000  |
| C  | -4.232614 | 0.876351  | 0.000000  |
| C  | -3.826242 | 2.194653  | 0.000000  |
| C  | -3.039914 | -1.368512 | 0.000000  |
| C  | -4.639975 | 3.404053  | 0.000000  |
| C  | -5.980325 | 3.458391  | 0.000000  |
| O  | 5.046972  | -3.902753 | 0.000000  |
| H  | 2.951524  | 4.631442  | 0.000000  |
| H  | 5.312013  | -0.309412 | 0.000000  |
| H  | -0.406893 | -4.879309 | 0.878884  |
| H  | 4.125576  | 2.219827  | 0.000000  |
| H  | -0.406893 | -4.879309 | -0.878884 |
| H  | -5.250349 | 0.505681  | 0.000000  |
| H  | -1.962158 | 4.240659  | 0.000000  |
| H  | -4.018899 | -1.841430 | 0.000000  |
| H  | -4.094952 | 4.346501  | 0.000000  |
| H  | 2.517259  | -4.668473 | 0.879342  |
| H  | -2.659812 | -4.097695 | -0.879635 |

|   |           |           |           |
|---|-----------|-----------|-----------|
| H | -2.659812 | -4.097695 | 0.879635  |
| H | 2.517259  | -4.668473 | -0.879342 |
| H | -6.599038 | 2.564708  | 0.000000  |
| H | -6.503309 | 4.409706  | 0.000000  |
| H | 0.392978  | 5.474713  | 0.000000  |
| O | -0.079670 | 0.301060  | 2.222897  |
| O | -0.079670 | 0.301060  | -2.222897 |
| H | -0.953574 | 0.717993  | 2.313633  |
| H | -0.953574 | 0.717993  | -2.313633 |
| H | 0.556228  | 1.022285  | -2.366270 |
| H | 0.556228  | 1.022285  | 2.366270  |

ENERGY=-1571.504143 Hartree

---

Chl.a-73

|    |           |           |           |
|----|-----------|-----------|-----------|
| N  | -0.648482 | 1.362157  | -0.260604 |
| C  | -1.953721 | 1.089543  | -0.338849 |
| C  | -2.739832 | 2.271835  | -0.383685 |
| C  | -1.863123 | 3.350821  | -0.332012 |
| C  | -0.544624 | 2.752351  | -0.256117 |
| C  | -4.146332 | 1.900350  | -0.474716 |
| C  | -4.162597 | 0.298643  | -0.523069 |
| C  | -2.696486 | -0.110717 | -0.403699 |
| C  | -2.141558 | -1.374152 | -0.360790 |
| N  | -0.786287 | -1.576936 | -0.227357 |
| C  | -0.518853 | -2.902920 | -0.105414 |
| C  | -1.805383 | -3.720052 | -0.031038 |
| C  | -2.883399 | -2.697699 | -0.474415 |
| C  | 0.740607  | -3.484886 | -0.014980 |
| C  | 2.003825  | -2.858018 | 0.002799  |
| N  | 2.196773  | -1.508872 | -0.042030 |
| C  | 3.555445  | -1.279651 | 0.017749  |
| C  | 4.255006  | -2.559947 | 0.086788  |
| C  | 3.282008  | -3.542191 | 0.087255  |
| C  | 4.151551  | -0.022620 | 0.008336  |
| C  | 3.524262  | 1.241101  | -0.036710 |
| N  | 2.174023  | 1.429845  | -0.101832 |
| C  | 1.956999  | 2.791095  | -0.119510 |
| C  | 3.229562  | 3.489001  | -0.063031 |
| C  | 4.207937  | 2.519676  | -0.013593 |
| Mg | 0.755841  | -0.082420 | -0.156350 |
| C  | 5.695108  | 2.702570  | 0.062125  |
| C  | 3.404123  | 4.982174  | -0.021794 |
| C  | 3.250642  | 5.576743  | 1.392003  |
| C  | 0.693803  | 3.399655  | -0.190830 |
| C  | 3.463088  | -5.024827 | 0.203498  |
| C  | 5.705000  | -2.695315 | 0.179983  |
| C  | 6.449487  | -3.722564 | -0.257630 |
| C  | -3.388260 | -2.952636 | -1.907283 |
| C  | -2.044977 | -4.265224 | 1.388822  |
| O  | -5.145097 | 2.590953  | -0.517850 |
| C  | -5.068007 | -0.231989 | 0.575664  |
| O  | -6.357877 | -0.182141 | 0.188932  |
| C  | -7.317240 | -0.555472 | 1.190745  |

|   |           |           |           |
|---|-----------|-----------|-----------|
| C | -2.196970 | 4.810277  | -0.349034 |
| O | -4.703883 | -0.628799 | 1.663133  |
| H | -4.614528 | 0.032135  | -1.486113 |
| H | -1.758008 | -4.566453 | -0.727896 |
| H | -1.230692 | -4.926737 | 1.703652  |
| H | -2.116537 | -3.445758 | 2.112786  |
| H | -2.981340 | -4.834021 | 1.427890  |
| H | -3.736329 | -2.711207 | 0.212833  |
| H | -3.279043 | 4.948607  | -0.415305 |
| H | -1.843335 | 5.315603  | 0.558849  |
| H | -1.733800 | 5.321414  | -1.202809 |
| H | 0.677073  | 4.485700  | -0.199526 |
| H | 4.393370  | 5.246586  | -0.414319 |
| H | 2.680279  | 5.461086  | -0.693873 |
| H | 3.379526  | 6.665210  | 1.374155  |
| H | 2.260848  | 5.356712  | 1.806594  |
| H | 3.995980  | 5.155696  | 2.075535  |
| H | 6.215118  | 2.122551  | -0.710538 |
| H | 5.977198  | 3.751260  | -0.071417 |
| H | 6.096930  | 2.379003  | 1.031678  |
| H | 5.236138  | -0.006321 | 0.043381  |
| H | 6.225450  | -1.862240 | 0.651943  |
| H | 7.527369  | -3.724635 | -0.123751 |
| H | 6.024374  | -4.573251 | -0.780582 |
| H | 4.389446  | -5.262209 | 0.736513  |
| H | 2.633560  | -5.489027 | 0.747635  |
| H | 3.519053  | -5.514643 | -0.778730 |
| H | 0.747266  | -4.568623 | 0.050481  |
| H | -8.292597 | -0.440162 | 0.717495  |
| H | -7.161380 | -1.590868 | 1.506377  |
| H | -7.233575 | 0.098719  | 2.062333  |
| H | -4.112122 | -2.194268 | -2.222880 |
| H | -2.557308 | -2.942627 | -2.622369 |
| H | -3.878334 | -3.931375 | -1.970197 |

ENERGY= -1921.725176 Hartree

---

Ch.a-73 1w

|   |           |           |           |
|---|-----------|-----------|-----------|
| N | -0.669574 | 1.365826  | -0.229776 |
| C | -1.967322 | 1.083236  | -0.367540 |
| C | -2.754967 | 2.259366  | -0.500042 |
| C | -1.881731 | 3.343659  | -0.460981 |
| C | -0.567711 | 2.753665  | -0.296611 |
| C | -4.154097 | 1.878092  | -0.634494 |
| C | -4.165557 | 0.275502  | -0.602003 |
| C | -2.700947 | -0.123849 | -0.450274 |
| C | -2.144822 | -1.388446 | -0.420017 |
| N | -0.799852 | -1.592804 | -0.231629 |
| C | -0.524794 | -2.920638 | -0.179049 |
| C | -1.807800 | -3.749773 | -0.199830 |
| C | -2.876106 | -2.708823 | -0.627714 |
| C | 0.738946  | -3.495699 | -0.086648 |
| C | 1.999731  | -2.859135 | -0.047503 |
| N | 2.183433  | -1.510787 | -0.028277 |
| C | 3.538916  | -1.273988 | -0.000275 |
| C | 4.250951  | -2.551773 | -0.003852 |

|    |           |           |           |
|----|-----------|-----------|-----------|
| C  | 3.284607  | -3.539691 | -0.024847 |
| C  | 4.129032  | -0.012610 | -0.000641 |
| C  | 3.499650  | 1.251555  | -0.039465 |
| N  | 2.151633  | 1.441809  | -0.063807 |
| C  | 1.935260  | 2.799052  | -0.139788 |
| C  | 3.211758  | 3.498553  | -0.146484 |
| C  | 4.188557  | 2.530371  | -0.085459 |
| Mg | 0.728979  | -0.077784 | 0.144599  |
| O  | 0.285130  | -0.089263 | 2.250122  |
| C  | 5.677914  | 2.710037  | -0.069627 |
| C  | 3.388267  | 4.991633  | -0.180376 |
| C  | 3.258038  | 5.654558  | 1.204914  |
| C  | 0.672195  | 3.404623  | -0.236579 |
| C  | 3.477820  | -5.024995 | 0.010354  |
| C  | 5.703645  | -2.679055 | 0.042158  |
| C  | 6.444794  | -3.684243 | -0.449738 |
| C  | -3.325196 | -2.895675 | -2.089316 |
| C  | -2.098532 | -4.381385 | 1.173325  |
| O  | -5.155006 | 2.558772  | -0.747602 |
| C  | -5.050975 | -0.190420 | 0.541545  |
| O  | -6.344285 | -0.214430 | 0.165970  |
| C  | -7.284257 | -0.533033 | 1.204284  |
| C  | -2.215551 | 4.798766  | -0.579999 |
| O  | -4.666761 | -0.480723 | 1.656780  |
| H  | -4.626131 | -0.048072 | -1.542232 |
| H  | -1.728872 | -4.554169 | -0.941906 |
| H  | -1.289791 | -5.052218 | 1.482987  |
| H  | -2.211981 | -3.608155 | 1.942688  |
| H  | -3.028767 | -4.960778 | 1.142455  |
| H  | -3.756027 | -2.763150 | 0.024534  |
| H  | -3.297004 | 4.932266  | -0.665294 |
| H  | -1.867898 | 5.367611  | 0.291877  |
| H  | -1.746573 | 5.249225  | -1.464454 |
| H  | 0.656066  | 4.488996  | -0.300389 |
| H  | 4.371239  | 5.235896  | -0.600821 |
| H  | 2.653975  | 5.438763  | -0.863083 |
| H  | 3.389626  | 6.740585  | 1.132814  |
| H  | 2.274027  | 5.458609  | 1.644864  |
| H  | 4.012616  | 5.264215  | 1.896563  |
| H  | 6.166649  | 2.115528  | -0.851833 |
| H  | 5.957588  | 3.755461  | -0.231011 |
| H  | 6.115546  | 2.400488  | 0.888955  |
| H  | 5.214305  | 0.006589  | 0.002670  |
| H  | 6.231060  | -1.857918 | 0.527339  |
| H  | 7.525955  | -3.680221 | -0.345034 |
| H  | 6.013617  | -4.521093 | -0.989708 |
| H  | 4.411419  | -5.283095 | 0.521002  |
| H  | 2.657556  | -5.525157 | 0.536633  |
| H  | 3.528159  | -5.461851 | -0.996926 |
| H  | 0.755347  | -4.581540 | -0.076821 |
| H  | -8.265431 | -0.496886 | 0.730394  |
| H  | -7.087842 | -1.529614 | 1.609424  |
| H  | -7.222048 | 0.199084  | 2.013572  |
| H  | -4.043624 | -2.128460 | -2.394665 |
| H  | -2.467256 | -2.842052 | -2.769445 |
| H  | -3.802487 | -3.874073 | -2.220264 |
| H  | -0.441640 | 0.551677  | 2.335202  |
| H  | -0.089529 | -0.942870 | 2.522432  |

ENERGY=-1998.162800 Hartree

---

Ch.a-73 2w(5-coordinated)

|    |           |           |           |
|----|-----------|-----------|-----------|
| N  | -0.610940 | 1.303045  | -0.508463 |
| C  | -1.903330 | 1.007935  | -0.639010 |
| C  | -2.708138 | 2.175857  | -0.758161 |
| C  | -1.843785 | 3.272331  | -0.705426 |
| C  | -0.527793 | 2.692695  | -0.540174 |
| C  | -4.102501 | 1.781810  | -0.864609 |
| C  | -4.103593 | 0.179518  | -0.763458 |
| C  | -2.630223 | -0.207258 | -0.672816 |
| C  | -2.069014 | -1.466607 | -0.594921 |
| N  | -0.725896 | -1.649840 | -0.391635 |
| C  | -0.437677 | -2.967641 | -0.295284 |
| C  | -1.707761 | -3.816749 | -0.312285 |
| C  | -2.788511 | -2.799418 | -0.764719 |
| C  | 0.832221  | -3.523132 | -0.159732 |
| C  | 2.078211  | -2.868013 | -0.081788 |
| N  | 2.247287  | -1.517920 | -0.059591 |
| C  | 3.597146  | -1.270276 | 0.016993  |
| C  | 4.324307  | -2.542171 | 0.040589  |
| C  | 3.370491  | -3.537878 | -0.012848 |
| C  | 4.176959  | -0.005242 | 0.037620  |
| C  | 3.533251  | 1.250596  | -0.038787 |
| N  | 2.186038  | 1.422610  | -0.109315 |
| C  | 1.959585  | 2.776251  | -0.236821 |
| C  | 3.228882  | 3.491155  | -0.213175 |
| C  | 4.211850  | 2.536451  | -0.093204 |
| Mg | 0.746237  | -0.110811 | 0.115726  |
| O  | 0.273272  | -0.098194 | 2.148073  |
| C  | 5.698407  | 2.730359  | -0.036530 |
| C  | 3.390118  | 4.984702  | -0.283393 |
| C  | 3.190952  | 5.684514  | 1.075401  |
| C  | 0.699743  | 3.363099  | -0.411934 |
| C  | 3.575789  | -5.021091 | 0.030741  |
| C  | 5.775914  | -2.653418 | 0.136874  |
| C  | 6.544876  | -3.647118 | -0.335179 |
| C  | -3.240410 | -3.025303 | -2.219809 |
| C  | -1.993842 | -4.428592 | 1.070692  |
| O  | -5.118573 | 2.442150  | -0.974777 |
| C  | -4.887366 | -0.186323 | 0.481615  |
| O  | -6.136364 | -0.572424 | 0.195451  |
| C  | -6.992659 | -0.828918 | 1.325084  |
| C  | -2.193974 | 4.725064  | -0.813486 |
| O  | -4.466007 | -0.111324 | 1.627203  |
| O  | -2.077461 | 1.098016  | 2.606675  |
| H  | -4.634762 | -0.209315 | -1.637430 |
| H  | -1.613277 | -4.631772 | -1.041187 |
| H  | -1.183788 | -5.095080 | 1.385391  |
| H  | -2.096483 | -3.644572 | 1.829770  |
| H  | -2.924030 | -5.009155 | 1.050540  |
| H  | -3.669885 | -2.852029 | -0.112409 |
| H  | -3.279509 | 4.854105  | -0.812947 |
| H  | -1.776613 | 5.310125  | 0.015481  |
| H  | -1.805093 | 5.163186  | -1.742315 |
| H  | 0.671318  | 4.446984  | -0.479784 |
| H  | 4.387802  | 5.229593  | -0.666972 |
| H  | 2.681507  | 5.402612  | -1.010194 |
| H  | 3.309678  | 6.770036  | 0.978093  |

|   |           |           |           |
|---|-----------|-----------|-----------|
| H | 2.191831  | 5.485554  | 1.478491  |
| H | 3.920869  | 5.325906  | 1.809538  |
| H | 6.214175  | 2.134741  | -0.800407 |
| H | 5.973285  | 3.777151  | -0.197426 |
| H | 6.112300  | 2.431110  | 0.935840  |
| H | 5.261109  | 0.025504  | 0.078912  |
| H | 6.276946  | -1.829461 | 0.644878  |
| H | 7.621637  | -3.632501 | -0.192688 |
| H | 6.141534  | -4.484710 | -0.895235 |
| H | 4.502048  | -5.269248 | 0.559161  |
| H | 2.750199  | -5.526258 | 0.543709  |
| H | 3.647888  | -5.460253 | -0.974220 |
| H | 0.864155  | -4.608252 | -0.131646 |
| H | -7.955821 | -1.109066 | 0.899059  |
| H | -6.587579 | -1.640266 | 1.934986  |
| H | -7.088133 | 0.069959  | 1.938590  |
| H | -3.967418 | -2.272183 | -2.540190 |
| H | -2.384808 | -2.977752 | -2.903105 |
| H | -3.707441 | -4.011527 | -2.326745 |
| H | 0.914414  | 0.283037  | 2.765631  |
| H | -0.614977 | 0.316591  | 2.362902  |
| H | -2.075085 | 1.871200  | 2.019775  |
| H | -2.855958 | 0.581563  | 2.299094  |

ENERGY=-2074.608093 Hartree

---

Chl.a-73 2w' (6-coordinated)

|    |           |           |           |
|----|-----------|-----------|-----------|
| N  | 2.120561  | 1.446616  | -0.075966 |
| C  | 3.472414  | 1.253857  | -0.023503 |
| C  | 4.153467  | 2.536806  | -0.003749 |
| C  | 3.172632  | 3.505964  | -0.047699 |
| C  | 1.897421  | 2.807311  | -0.095103 |
| C  | 4.102539  | -0.014457 | 0.012765  |
| C  | 3.516816  | -1.283545 | 0.007484  |
| N  | 2.167943  | -1.520682 | -0.095590 |
| C  | 1.964159  | -2.864120 | -0.016994 |
| C  | 3.244037  | -3.547650 | 0.113644  |
| C  | 4.217793  | -2.565035 | 0.117962  |
| C  | 0.695072  | -3.486513 | -0.038787 |
| C  | -0.577557 | -2.914757 | -0.124321 |
| N  | -0.858824 | -1.597309 | -0.228083 |
| C  | -2.205412 | -1.387875 | -0.357041 |
| C  | -2.950422 | -2.712299 | -0.472555 |
| C  | -1.860639 | -3.742747 | -0.064560 |
| C  | -2.753726 | -0.114727 | -0.394660 |
| C  | -2.018354 | 1.094342  | -0.324110 |
| C  | -2.811778 | 2.274406  | -0.395786 |
| C  | -4.214205 | 1.891748  | -0.500937 |
| C  | -4.221626 | 0.289875  | -0.519215 |
| C  | -1.941895 | 3.359329  | -0.341917 |
| C  | -0.618044 | 2.766558  | -0.234568 |
| N  | -0.720568 | 1.381313  | -0.217634 |
| Mg | 0.675787  | -0.105980 | -0.150253 |
| O  | 0.578089  | 0.016974  | 2.072554  |

|   |           |           |           |
|---|-----------|-----------|-----------|
| C | -2.283684 | 4.816580  | -0.388904 |
| C | 0.626722  | 3.412868  | -0.168823 |
| C | -5.113624 | -0.212482 | 0.603497  |
| O | -4.740926 | -0.524522 | 1.715563  |
| O | -5.218207 | 2.573963  | -0.566427 |
| C | -2.088102 | -4.333206 | 1.338548  |
| C | -3.486841 | -2.952864 | -1.896037 |
| C | 5.664367  | -2.696962 | 0.252836  |
| C | 6.422841  | -3.735405 | -0.132289 |
| C | 3.423234  | -5.026835 | 0.270518  |
| C | 5.641050  | 2.724306  | 0.061510  |
| C | 3.347688  | 4.999558  | -0.009843 |
| C | 3.193611  | 5.598476  | 1.402012  |
| O | 0.969386  | -0.124638 | -2.365569 |
| O | -6.402793 | -0.240442 | 0.210114  |
| C | -7.350932 | -0.592143 | 1.229974  |
| H | -4.681021 | -0.001447 | -1.470955 |
| H | -1.815547 | -4.567022 | -0.787909 |
| H | -1.271259 | -5.004454 | 1.625044  |
| H | -2.150272 | -3.537313 | 2.089161  |
| H | -3.024096 | -4.903448 | 1.368820  |
| H | -3.788423 | -2.737203 | 0.233681  |
| H | -3.366705 | 4.948404  | -0.454295 |
| H | -1.928303 | 5.345162  | 0.505104  |
| H | -1.827177 | 5.311432  | -1.256048 |
| H | 0.611101  | 4.499192  | -0.187964 |
| H | 4.336854  | 5.264289  | -0.402556 |
| H | 2.623102  | 5.477013  | -0.682358 |
| H | 3.323041  | 6.686860  | 1.382016  |
| H | 2.202715  | 5.380811  | 1.815536  |
| H | 3.938305  | 5.178994  | 2.087415  |
| H | 6.157891  | 2.144198  | -0.713302 |
| H | 5.920456  | 3.773457  | -0.074884 |
| H | 6.051133  | 2.402370  | 1.028292  |
| H | 5.186849  | 0.008491  | 0.063100  |
| H | 6.171419  | -1.848169 | 0.711617  |
| H | 7.496739  | -3.730246 | 0.030705  |
| H | 6.013661  | -4.604069 | -0.638118 |
| H | 4.332188  | -5.250958 | 0.838467  |
| H | 2.576351  | -5.478315 | 0.798204  |
| H | 3.511100  | -5.540246 | -0.697401 |
| H | 0.705026  | -4.570682 | 0.027556  |
| H | -8.327299 | -0.553921 | 0.746260  |
| H | -7.149491 | -1.596120 | 1.613855  |
| H | -7.304372 | 0.120922  | 2.057133  |
| H | -4.223723 | -2.196789 | -2.185528 |
| H | -2.671997 | -2.925703 | -2.628735 |
| H | -3.970857 | -3.934608 | -1.960759 |
| H | 1.341711  | 0.605761  | 2.201431  |
| H | -0.197538 | 0.593976  | 2.177694  |
| H | 1.348818  | 0.762275  | -2.485911 |
| H | 1.737830  | -0.721537 | -2.336389 |

ENERGY=-2074.592243 Hartree

**Table S2.** Selected bond distances (in Å) for Chl.a-46 and Chl.a-73 models and their monohydrated (1w) and dihydrated (2w and 2w') complexes as computed at the B3LYP/6-31G\* level in gas phase.

| Bond distances              | Model Ch.a-46 |       |       |       | Model Ch.a-73 |       |       |       |
|-----------------------------|---------------|-------|-------|-------|---------------|-------|-------|-------|
|                             | Chl.a         | 1w    | 2w    | 2w'   | Chl.a         | 1w    | 2w    | 2w'   |
| Mg-N                        | 2.069         | 2.095 | 2.106 | 2.092 | 2.068         | 2.081 | 2.107 | 2.090 |
| O...Mg                      | –             | 2.146 | 2.094 | 2.229 | –             | 2.152 | 2.087 | 2.231 |
| Mg-N <sub>A,B,C</sub> plane | 0.000         | 0.277 | 0.361 | 0.000 | 0.004         | 0.275 | 0.406 | 0.000 |
| Mg-N <sub>A,C,D</sub> plane | 0.000         | 0.277 | 0.361 | 0.000 | 0.004         | 0.275 | 0.405 | 0.000 |
| Mg-N <sub>B,C,D</sub> plane | 0.000         | 0.293 | 0.365 | 0.000 | 0.005         | 0.289 | 0.360 | 0.009 |
| Mg-N <sub>A,B,D</sub> plane | 0.000         | 0.292 | 0.365 | 0.000 | 0.004         | 0.288 | 0.362 | 0.008 |

**Table S3.** Solvation energies at the B3LYP/6-31G\* level for different species in cyclohexane using the Polarizable Continuum Model (PCM).

## H<sub>2</sub>O

Variational PCM results

```

=====
<psi(f)| H |psi(f)> (a.u.) = -76.408761
<psi(f)|H+V(f)/2|psi(f)> (a.u.) = -76.413574
Total free energy in solution:
with all non electrostatic terms (a.u.) = -76.411952
-----
(Polarized solute)-Solvent (kcal/mol) = -3.02
-----
Cavitation energy (kcal/mol) = 4.21
Dispersion energy (kcal/mol) = -3.60
Repulsion energy (kcal/mol) = 0.41
Total non electrostatic (kcal/mol) = 1.02
-----

```

## Ch.a-73

Variational PCM results

```

=====
<psi(f)| H |psi(f)> (a.u.) = -1921.724766
<psi(f)|H+V(f)/2|psi(f)> (a.u.) = -1921.734572
Total free energy in solution:
with all non electrostatic terms (a.u.) = -1921.703710
-----
(Polarized solute)-Solvent (kcal/mol) = -6.15

```

```
-----  
Cavitation energy (kcal/mol) = 52.82  
Dispersion energy (kcal/mol) = -34.72  
Repulsion energy (kcal/mol) = 1.27  
Total non electrostatic (kcal/mol) = 19.37  
-----
```

### Chl.a-73 1w

Variational PCM results

=====

```
<psi(f) | H |psi(f)> (a.u.) = -1998.162435  
<psi(f) |H+V(f)/2|psi(f)> (a.u.) = -1998.171226  
Total free energy in solution:  
with all non electrostatic terms (a.u.) = -1998.136568
```

```
-----  
(Polarized solute)-Solvent (kcal/mol) = -5.52  
-----
```

```
Cavitation energy (kcal/mol) = 54.91  
Dispersion energy (kcal/mol) = -34.44  
Repulsion energy (kcal/mol) = 1.27  
Total non electrostatic (kcal/mol) = 21.75  
-----
```

### Chl.a-73 2w (5-coordinated)

Variational PCM results

=====

```
<psi(f) | H |psi(f)> (a.u.) = -2074.607761  
<psi(f) |H+V(f)/2|psi(f)> (a.u.) = -2074.615496  
Total free energy in solution:  
with all non electrostatic terms (a.u.) = -2074.578976
```

```
-----  
(Polarized solute)-Solvent (kcal/mol) = -4.85  
-----
```

```
Cavitation energy (kcal/mol) = 56.31  
Dispersion energy (kcal/mol) = -34.68  
Repulsion energy (kcal/mol) = 1.28  
Total non electrostatic (kcal/mol) = 22.92  
-----
```

### Chl.a-73 2w' (6-coordinated)

Variational PCM results

=====

```
<psi(f) | H |psi(f)> (a.u.) = -2074.591863  
<psi(f) |H+V(f)/2|psi(f)> (a.u.) = -2074.600853  
Total free energy in solution:  
with all non electrostatic terms (a.u.) = -2074.563890
```

```
-----  
(Polarized solute)-Solvent (kcal/mol) = -5.64  
-----
```

```
Cavitation energy (kcal/mol) = 56.22  
Dispersion energy (kcal/mol) = -34.30  
Repulsion energy (kcal/mol) = 1.28  
Total non electrostatic (kcal/mol) = 23.19  
-----
```
